# Supplementary material for: Airport Entry and Exit Screening during the Ebola Virus Disease Outbreak in Sierra Leone, 2014 to 2016
Source: PubMed Central journal article supplement (PMC6930773; doi:10.1155/2019/3832790), 2019-10-20
Supplement: 3832790.f1.pdf [file 3832790.f1.pdf]

# Appendix 1: Health Declaration Form (Primary Screening Form)

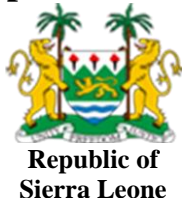

Airline:   
Flight Number:

Temperature of Traveler (°C):   
Date of Interview (DD/MM/YYYY):

## HEALTH DECLARATION FORM: FORMULAIRE DE DECLARATION SANTE

This form is to be used to obtain important information from passengers entering or leaving the country, through the Freetown International Airport, on any possible exposure to the Ebola virus. The data received through this form will be treated confidentially in accordance with the International Health Regulations.

| A. Passenger Information                   |                                                                 |
|--------------------------------------------|-----------------------------------------------------------------|
| 1. Name of Passenger:                      | 8. Permanent Address:                                           |
| 2. Gender:                                 | 9. Address in Sierra Leone:                                     |
| 3. Age:                                    |                                                                 |
| 4. Date of Birth (DD/MM/YYYY):             | 10. Telephone in Sierra Leone:                                  |
| 5A. Country flight is <b>going to</b> :    | 11. Mobile phone (include country code):                        |
| 5B. Country flight is <b>coming from</b> : | 12. E-mail address:                                             |
| 6. Nationality:                            | 13. Countries visited in last 2 months, including Sierra Leone: |
| 7. Passport Number:                        | 14. Areas you visited in that country:                          |

Temperature of Traveler at Boarding Gate (°C):

| B. Exposure Information – In the past 3 weeks:                                                          | Yes                      | No                       |
|---------------------------------------------------------------------------------------------------------|--------------------------|--------------------------|
| Did you have any close contact with a sick person with fever and bleeding?                              | <input type="checkbox"/> | <input type="checkbox"/> |
| <i>If yes, did you wear appropriate personal protective equipment (PPE) during all exposures?</i>       | <input type="checkbox"/> | <input type="checkbox"/> |
| <i>If yes, did you experience any breaches in PPE?</i>                                                  | <input type="checkbox"/> | <input type="checkbox"/> |
| Did you work in a laboratory processing body fluids of Ebola patients?                                  | <input type="checkbox"/> | <input type="checkbox"/> |
| <i>If yes, did you wear appropriate PPE and follow standard lab biosafety precautions at all times?</i> | <input type="checkbox"/> | <input type="checkbox"/> |
| <i>If yes, did you experience any breaches in PPE or biosafety?</i>                                     | <input type="checkbox"/> | <input type="checkbox"/> |
| Did you attend a funeral?                                                                               | <input type="checkbox"/> | <input type="checkbox"/> |
| Were you hospitalized?                                                                                  | <input type="checkbox"/> | <input type="checkbox"/> |

Name of hospital  
Reason for hospitalization

| C. Health Status- Now or in the last 2 days have you had: | Yes                      | No                       |
|-----------------------------------------------------------|--------------------------|--------------------------|
| Fever                                                     | <input type="checkbox"/> | <input type="checkbox"/> |
| Headache                                                  | <input type="checkbox"/> | <input type="checkbox"/> |
| Vomiting/nausea                                           | <input type="checkbox"/> | <input type="checkbox"/> |
| Diarrhea                                                  | <input type="checkbox"/> | <input type="checkbox"/> |
| Intense fatigue                                           | <input type="checkbox"/> | <input type="checkbox"/> |
| Difficulty breathing                                      | <input type="checkbox"/> | <input type="checkbox"/> |
| Muscular/joint pain                                       | <input type="checkbox"/> | <input type="checkbox"/> |
| Abdominal pain                                            | <input type="checkbox"/> | <input type="checkbox"/> |
| Redness of eyes                                           | <input type="checkbox"/> | <input type="checkbox"/> |
| Unusual bleeding                                          | <input type="checkbox"/> | <input type="checkbox"/> |

Passenger's Signature:

| FOR OFFICIAL USE ONLY                                   |                          |                          |
|---------------------------------------------------------|--------------------------|--------------------------|
| D. Screening Outcome (to be completed by screener)      | Yes                      | No                       |
| Allowed to board flight                                 | <input type="checkbox"/> | <input type="checkbox"/> |
| Referred to further medical assessment                  | <input type="checkbox"/> | <input type="checkbox"/> |
| <i>Time referred to further medical screening</i>       | <input type="checkbox"/> | <input type="checkbox"/> |
| Public health follow up in hospital                     | <input type="checkbox"/> | <input type="checkbox"/> |
| Public health follow up in location other than hospital | <input type="checkbox"/> | <input type="checkbox"/> |
| <i>List location:</i>                                   |                          |                          |
| Referred for secondary screening                        | <input type="checkbox"/> | <input type="checkbox"/> |
| Health Officers Comments, Signature, and Stamp          |                          |                          |

## Appendix 2: Secondary Screening Form

Freetown International Airport, Sierra Leone

Date of Interview

Time of Interview

### Republic of Sierra Leone

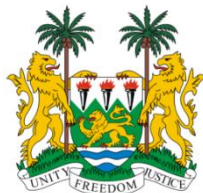

### PUBLIC HEALTH INTERVIEW: SECONDARY SCREENING

**Reason Individual Has Been Referred for Secondary Screening -**  
check all that apply & attach primary screening form (health declaration form)

Symptom(s)       Exposure(s)

#### SECTION 1: TRAVELER INFORMATION

Individual's Surname: \_\_\_\_\_ Other Name(s): \_\_\_\_\_

Passport #: \_\_\_\_\_ Passport Country: \_\_\_\_\_

Emergency Contact: \_\_\_\_\_

#### **Location Where Traveler Either Had Exposure or Became Ill:**

Village/Town: \_\_\_\_\_ District: \_\_\_\_\_ Province: \_\_\_\_\_

*If different from permanent residence, dates residing at this location:*

\_\_\_/\_\_\_/\_\_\_ (DD/MM/YYYY) to \_\_\_/\_\_\_/\_\_\_ (DD/MM/YYYY)

#### SECTION 2: EXPOSURES AND RISK FACTORS – to ask of the traveler

##### **In the last 3 weeks:**

**Did you have close contact with a known or suspect case of Ebola, or with any sick person?**       Yes    No    Unk

*If yes, did you wear appropriate personal protective equipment (PPE) during all exposures?*       Yes    No    Unk

*If yes, did you experience any breaches in PPE?*       Yes    No    Unk

**Did you work in a laboratory processing body fluids of Ebola patients?**       Yes    No    Unk

*If yes, did you wear appropriate PPE and follow standard lab biosafety precautions at all times?*       Yes    No    Unk

*If yes, did you experience any*       Yes    No    Unk

##### *breaches in PPE or biosafety?*

**Did you attend a funeral?**       Yes    No    Unk

**Did you travel outside your home or village/town?**       Yes    No    Unk

**Were you hospitalized, or did you go to a clinic or visit anyone in the hospital?**       Yes    No    Unk

*If yes, name of hospital or clinic:*

*If yes, reason for hospitalization or visit:*

**Did you consult a traditional/spiritual healer?**       Yes    No    Unk

**Did you have direct contact (hunt, touch, eat) with animals or uncooked meat?**       Yes    No    Unk

**Date of Exposure (If Applicable):** \_\_\_/\_\_\_/\_\_\_ (DD/MM/YYYY)

#### SECTION 2: CLINICAL SIGNS AND SYMPTOMS – to ask of the traveler

Have you taken fever- or pain-reducing medicine in the last 4 hours?  Yes  No

Have you experienced any of the following symptoms today OR within the past 48 hours?

|                                                                                                                              |                                                                                                                                     |
|------------------------------------------------------------------------------------------------------------------------------|-------------------------------------------------------------------------------------------------------------------------------------|
| Fever ( $\geq 38.0^{\circ} \text{C}$ ) <input type="checkbox"/> Yes <input type="checkbox"/> No <input type="checkbox"/> Unk | Unexplained bleeding from any site <input type="checkbox"/> Yes <input type="checkbox"/> No <input type="checkbox"/> Unk            |
| <i>If yes, Onset date</i> ___/___/___ (DD/MM/YYYY)                                                                           | <i>If yes, please specify:</i> _____                                                                                                |
| <i>Temp:</i> ___ °C                                                                                                          |                                                                                                                                     |
| Vomiting/nausea <input type="checkbox"/> Yes <input type="checkbox"/> No <input type="checkbox"/> Unk                        | Bleeding of the gums <input type="checkbox"/> Yes <input type="checkbox"/> No <input type="checkbox"/> Unk                          |
| Diarrhea <input type="checkbox"/> Yes <input type="checkbox"/> No <input type="checkbox"/> Unk                               | Bleeding from injection site <input type="checkbox"/> Yes <input type="checkbox"/> No <input type="checkbox"/> Unk                  |
| Intense fatigue/general weakness <input type="checkbox"/> Yes <input type="checkbox"/> No <input type="checkbox"/> Unk       | Nose bleed (epistaxis) <input type="checkbox"/> Yes <input type="checkbox"/> No <input type="checkbox"/> Unk                        |
| Anorexia/loss of appetite <input type="checkbox"/> Yes <input type="checkbox"/> No <input type="checkbox"/> Unk              | Blood or black stools (melena) <input type="checkbox"/> Yes <input type="checkbox"/> No <input type="checkbox"/> Unk                |
| Abdominal pain <input type="checkbox"/> Yes <input type="checkbox"/> No <input type="checkbox"/> Unk                         | Fresh/red blood in vomit (hematemesis) <input type="checkbox"/> Yes <input type="checkbox"/> No <input type="checkbox"/> Unk        |
| Chest pain <input type="checkbox"/> Yes <input type="checkbox"/> No <input type="checkbox"/> Unk                             | Coughing up blood (hemoptysis) <input type="checkbox"/> Yes <input type="checkbox"/> No <input type="checkbox"/> Unk                |
| Muscle pain <input type="checkbox"/> Yes <input type="checkbox"/> No <input type="checkbox"/> Unk                            | Bleeding from vagina, other than menstruation <input type="checkbox"/> Yes <input type="checkbox"/> No <input type="checkbox"/> Unk |
| Joint pain <input type="checkbox"/> Yes <input type="checkbox"/> No <input type="checkbox"/> Unk                             | Bruising of the skin (petechiae/ecchymosis) <input type="checkbox"/> Yes <input type="checkbox"/> No <input type="checkbox"/> Unk   |
| Headache <input type="checkbox"/> Yes <input type="checkbox"/> No <input type="checkbox"/> Unk                               | Other hemorrhagic symptoms <input type="checkbox"/> Yes <input type="checkbox"/> No <input type="checkbox"/> Unk                    |
| Cough <input type="checkbox"/> Yes <input type="checkbox"/> No <input type="checkbox"/> Unk                                  | <i>If yes, please specify:</i> _____                                                                                                |
| Difficulty breathing <input type="checkbox"/> Yes <input type="checkbox"/> No <input type="checkbox"/> Unk                   | Other non-hemorrhagic clinical symptoms <input type="checkbox"/> Yes <input type="checkbox"/> No <input type="checkbox"/> Unk       |
| Difficulty swallowing <input type="checkbox"/> Yes <input type="checkbox"/> No <input type="checkbox"/> Unk                  | <i>If yes, please specify:</i> _____                                                                                                |
| Sore throat <input type="checkbox"/> Yes <input type="checkbox"/> No <input type="checkbox"/> Unk                            |                                                                                                                                     |
| Jaundice (yellow eyes/gums/ skin) <input type="checkbox"/> Yes <input type="checkbox"/> No <input type="checkbox"/> Unk      |                                                                                                                                     |
| Conjunctivitis (red eyes) <input type="checkbox"/> Yes <input type="checkbox"/> No <input type="checkbox"/> Unk              |                                                                                                                                     |
| Skin rash <input type="checkbox"/> Yes <input type="checkbox"/> No <input type="checkbox"/> Unk                              |                                                                                                                                     |
| Hiccups <input type="checkbox"/> Yes <input type="checkbox"/> No <input type="checkbox"/> Unk                                |                                                                                                                                     |
| Pain behind eyes/sensitive to light <input type="checkbox"/> Yes <input type="checkbox"/> No <input type="checkbox"/> Unk    |                                                                                                                                     |
| Coma/unconscious <input type="checkbox"/> Yes <input type="checkbox"/> No <input type="checkbox"/> Unk                       |                                                                                                                                     |
| Confused or disoriented <input type="checkbox"/> Yes <input type="checkbox"/> No <input type="checkbox"/> Unk                |                                                                                                                                     |

**SECTION 4: TRIAGE, RESPONSE, CLINICAL SPECIMENS AND LABORATORY TESTING**

Please record the outcome of your assessment:

| Travel Intervention:                                                                                                                                                                                                                                                               | Medical Assessment and Intervention (check all that apply):                                                                                                                                                                                                                                                                                                                                                                                                                                                                                                                                                                                                                                  |
|------------------------------------------------------------------------------------------------------------------------------------------------------------------------------------------------------------------------------------------------------------------------------------|----------------------------------------------------------------------------------------------------------------------------------------------------------------------------------------------------------------------------------------------------------------------------------------------------------------------------------------------------------------------------------------------------------------------------------------------------------------------------------------------------------------------------------------------------------------------------------------------------------------------------------------------------------------------------------------------|
| <input type="checkbox"/> Allowed to board flight<br><input type="checkbox"/> Not allowed to board flight<br>Decision made by:<br><input type="checkbox"/> Port Health<br><input type="checkbox"/> Airline<br><input type="checkbox"/> Other, list _____<br>_____<br>_____<br>_____ | <input type="checkbox"/> Further assessment by surveillance officers<br><input type="checkbox"/> Held at airport for observation<br><input type="checkbox"/> Transported to government hospital/healthcare facility<br><input type="checkbox"/> Referred to medical provider of choice for further evaluation to clear for travel<br><input type="checkbox"/> Laboratory specimen taken and sent to laboratory for testing for Ebola<br><input type="checkbox"/> Suspect Ebola patient (complete travel companion listing form)<br><input type="checkbox"/> Illness not related to Ebola<br><input type="checkbox"/> None<br><input type="checkbox"/> Other, specify _____<br>_____<br>_____ |

## Appendix 3: Protocol for travellers denied boarding [7]

### Travellers Denied Boarding

If a traveller is denied boarding, FNA were mandated to notify (verbally and in writing) the traveller as well as the airline responsible and SLAA authorities provide safe transportation of the ill traveller to ETC for further public health evaluations. Secondary screening staff retained the HDF and Secondary Screening forms of all travellers who were referred to secondary screening or denied travel. Copies of the HDF and secondary screening form are retained by airport authority, CDC, Port Health authority and original HDF and secondary screening form to IOM.

### Clearance to Travel after ETC Evaluation

Individuals denied boarding because they are ill required further assessment and medical clearance to be allowed to travel once the ETC provides diagnostic evidence that laboratory tests are negative for EVD. If a diagnosis of a serious condition other than EVD is made, then a medical professional was required to certify that the ill traveller is fit to fly. Persons with fever only may be allowed to travel after 48 hours provided that the fever resolved and that vomiting, diarrhea or unexplained bleeding did not develop during that time period. Persons who were denied boarding because of vomiting, diarrhea or unexplained bleeding but who did not have a fever may leave after 24 hours provided that they are well do not have a fever, vomiting, diarrhea, or unexplained bleeding. Individuals denied boarding because of high risk exposures 21 days or less before travel were reported to the DSO. These individuals need to be followed for 21 days since the last exposure before being allowed to fly.
